# Supplementary material
Source: Springer Nature journal article supplement (https://www.springermedizin.de/resource/supplementary/12943_2013_1219_MOESM4_ESM.pdf/9552420)

CD133<sup>low</sup>  
CD133<sup>high</sup>

Tm4

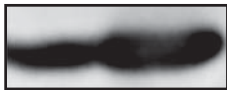

14-3-3 $\epsilon$

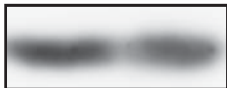

eIF3 $\beta$

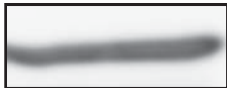

AdoHcyase

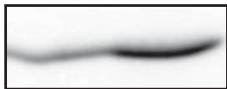

$\beta$ -tubulin

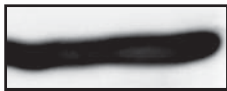

Supplement: MOESM4 [file 9552420]
